# Supplementary material for: ERLIN2 promotes breast cancer cell survival by modulating endoplasmic reticulum stress pathways
Source: PubMed Central journal article supplement (PMC3732090; doi:10.1186/1471-2407-12-225), 2012-06-08

Table S1: Expression Levels of XBP1, ERLIN1 and ERLIN2 in Ten SUM Breast Cancer Cell Lines Using Our Affymetrix Array Database

| TargetID | ProbeID | SUM-44 | SUM-52 | SUM-225 | SUM185 | SUM-190 | SUM102 | SUM-149 | SUM-149 | SUM-159 | SUM-229 | SUM-1315 |
|----------|---------|--------|--------|---------|--------|---------|--------|---------|---------|---------|---------|----------|
| XBP1     | 2450156 | 3.84   | 2.56   | 3.58    | 1.99   | 4.23    | 0.93   | -0.22   | 0.25    | 1.24    | 0.31    | 0.01     |
| XBP1     | 5690066 | 3.66   | 2.80   | 3.65    | 2.31   | 4.06    | 1.19   | 0.07    | 0.41    | 1.59    | 0.66    | 0.38     |
| ERLIN1   | 6110634 | -0.50  | -0.24  | -0.56   | -0.22  | -0.22   | -0.01  | -0.75   | 0.01    | 0.28    | -0.25   | 0.26     |
| ERLIN2   | 870646  | 2.46   | 0.13   | 1.24    | 0.11   | 0.38    | -1.24  | -0.83   | -0.36   | -1.12   | -0.59   | -1.28    |
| ERLIN2   | 3130048 | 2.62   | -0.19  | 1.30    | -0.02  | -0.12   | -1.36  | -0.84   | -0.87   | -1.00   | -0.49   | -1.39    |
| ERLIN2   | 5570048 | 1.43   | 0.70   | 2.31    | -0.43  | 0.17    | -0.98  | -0.75   | -0.65   | -0.71   | -1.04   | -1.29    |

Table S2: Expression of ERLIN2 in breast tissues:  
carcinomas and normal

| <b>IHC Score</b> | <b>HBC</b> | <b>Normal</b> |
|------------------|------------|---------------|
| <b>0</b>         | <b>2</b>   | <b>10</b>     |
| <b>1</b>         | <b>2</b>   | <b>4</b>      |
| <b>2</b>         | <b>6</b>   | <b>3</b>      |
| <b>3</b>         | <b>13</b>  | <b>0</b>      |
| <b>4</b>         | <b>11</b>  | <b>0</b>      |
| <b>Total</b>     | <b>34</b>  | <b>17</b>     |

Figure S1

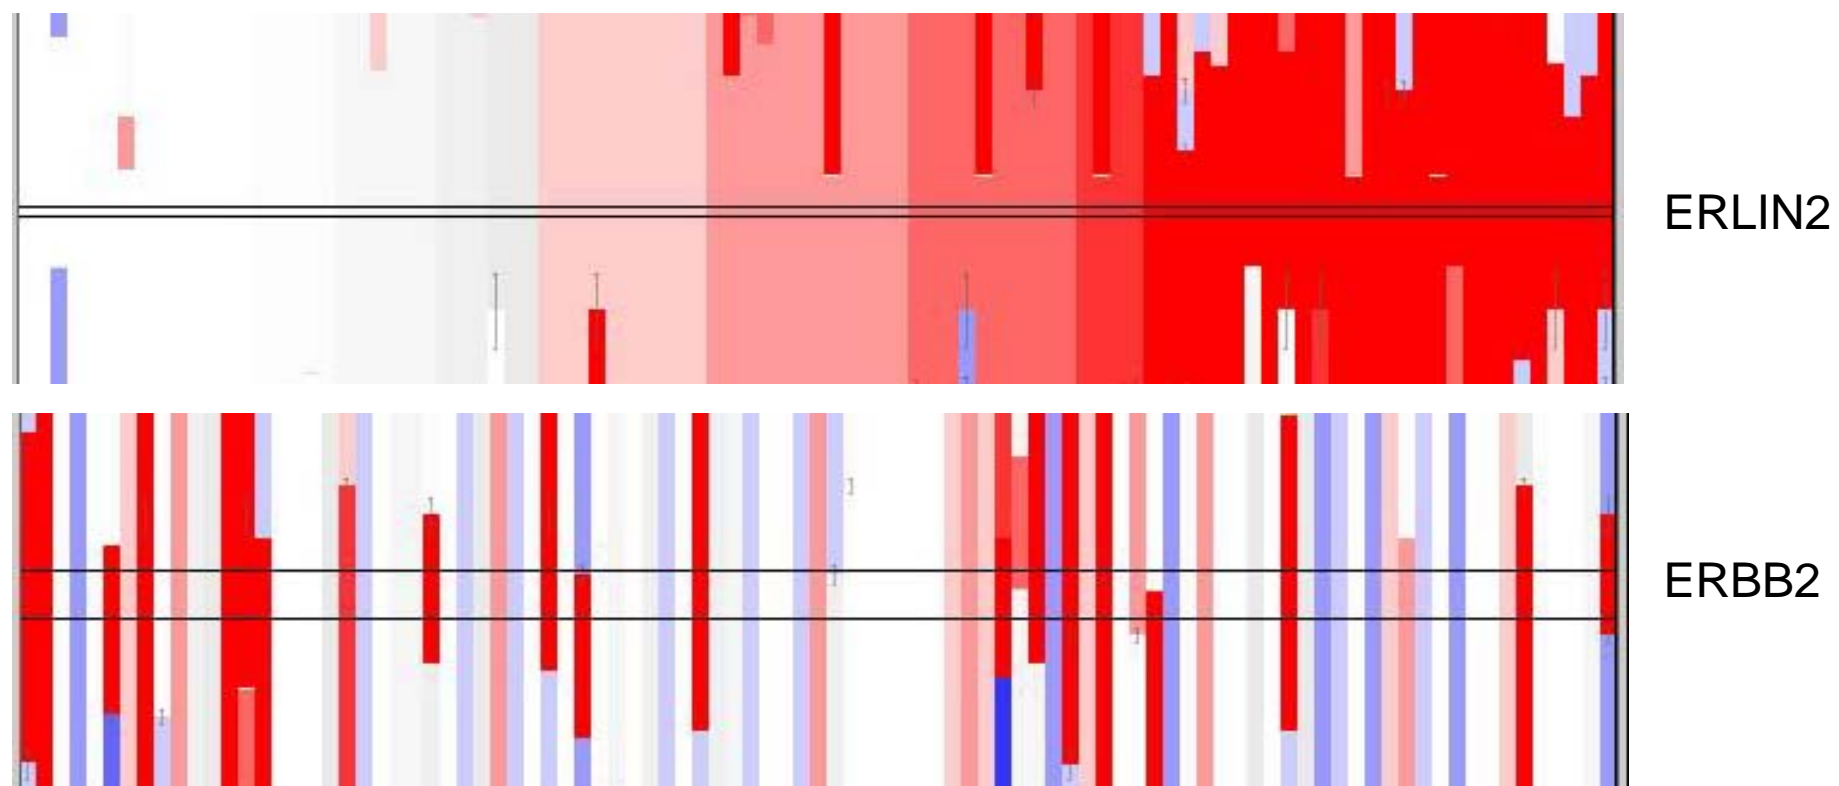

**Figure S2**

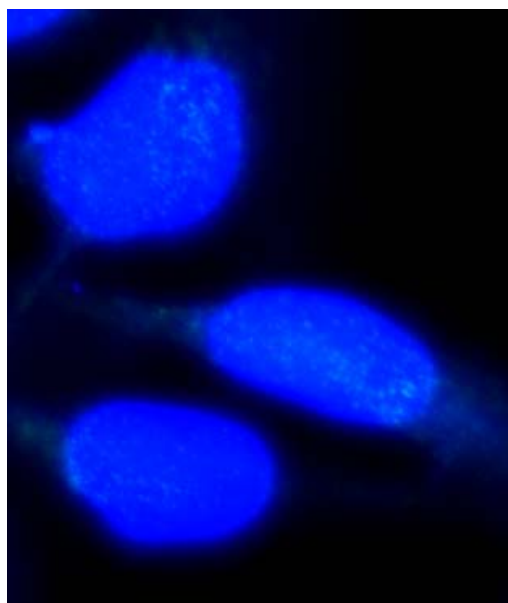

MCF10A-Ctrl

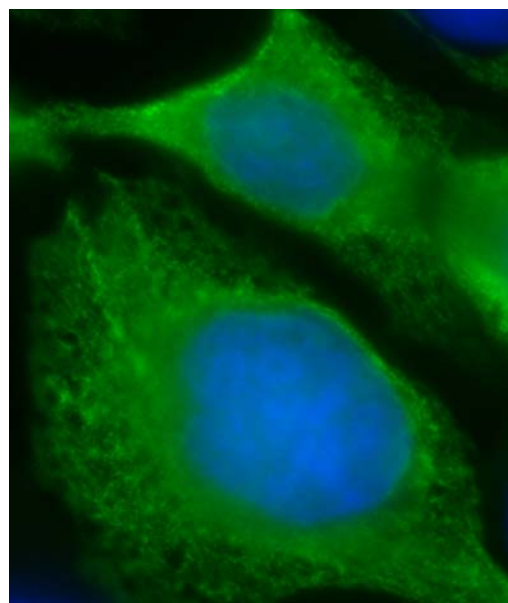

MCF10A-ERLIN2

**Figure S3**

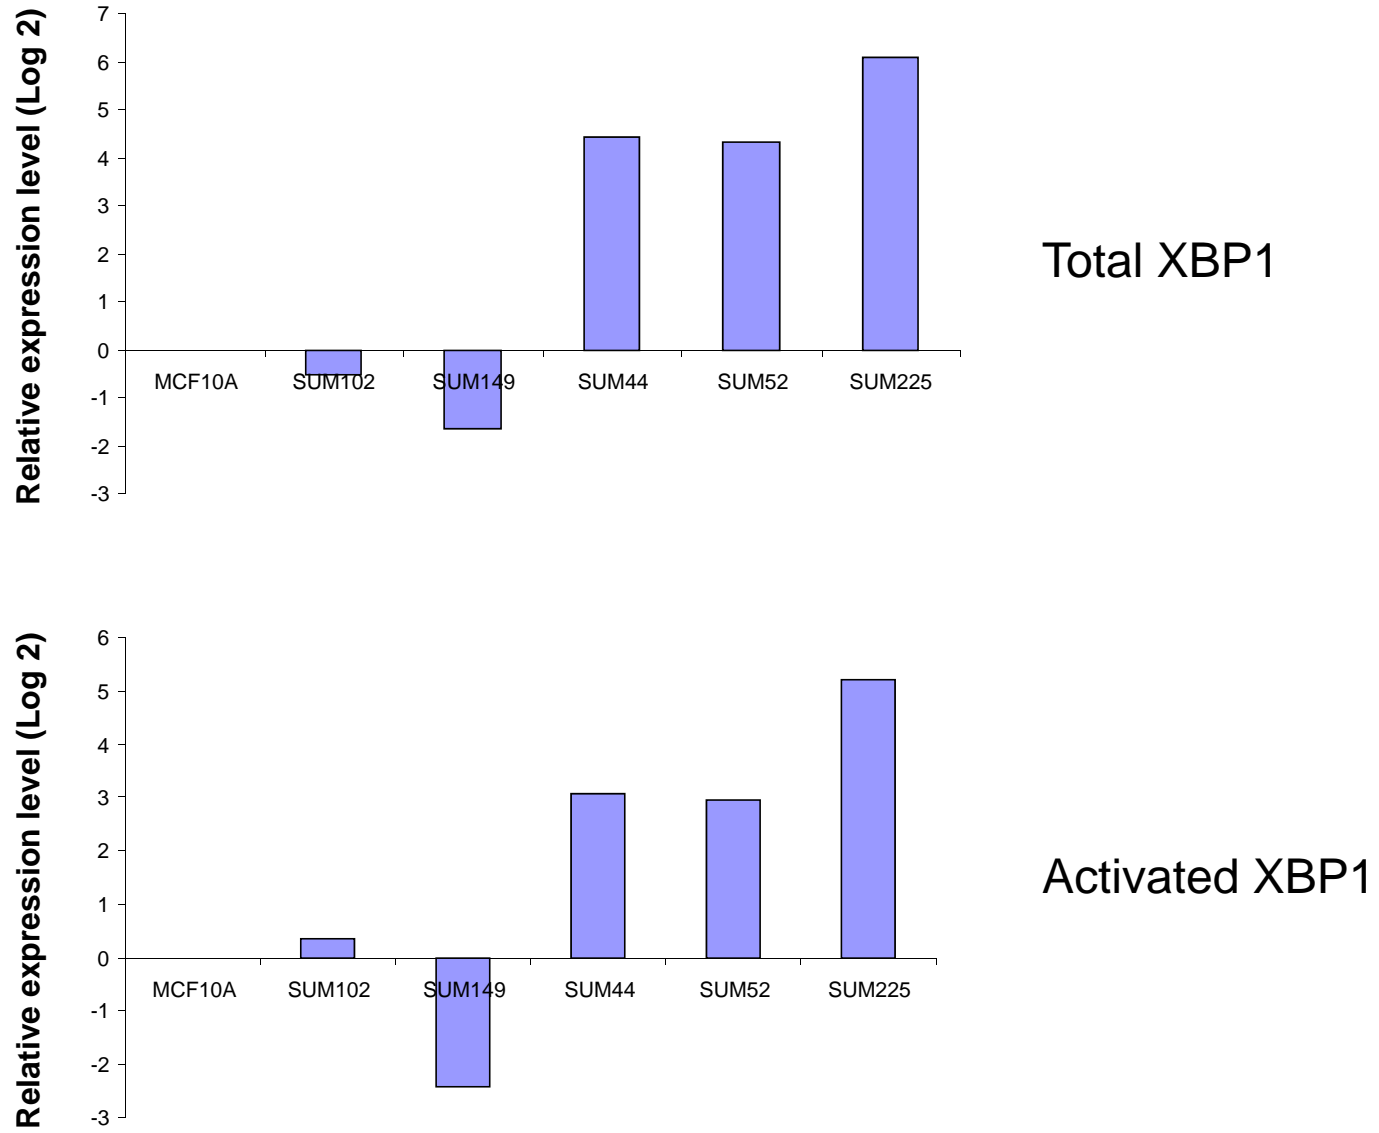

**Figure S4**

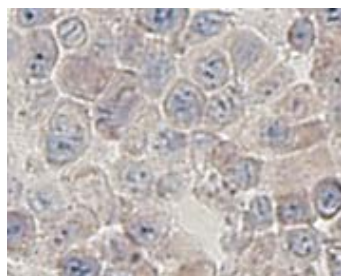

MCF10A

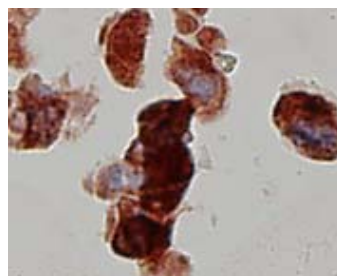

SUM-225

**Figure S5**

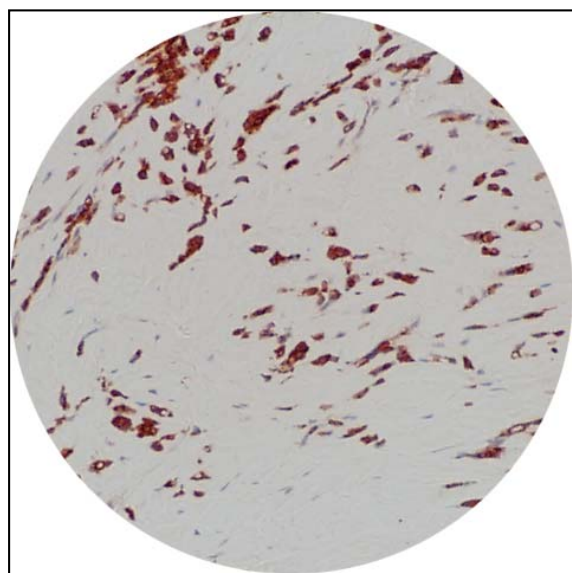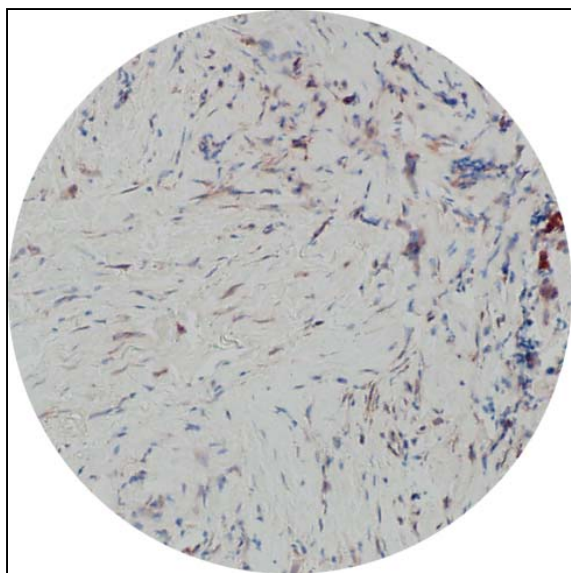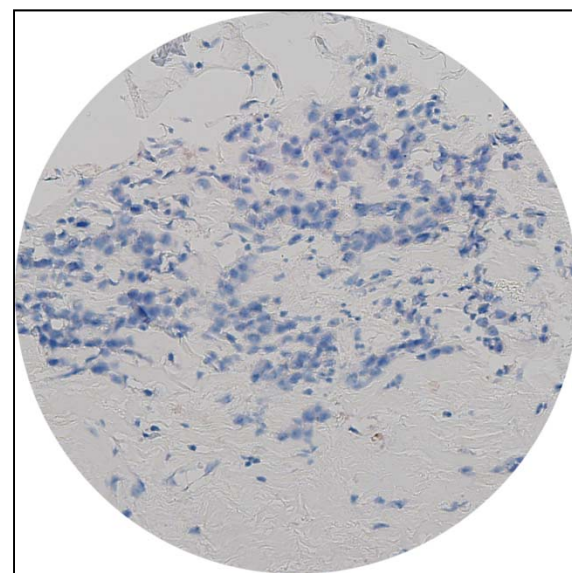

Supplement: 1471-2407-12-225-S2.pdf [file 1471-2407-12-225-S2.pdf]
